# Supplementary material for: miR-145 mediates the antiproliferative and gene regulatory effects of vitamin D3 by directly targeting E2F3 in gastric cancer cells
Source: PubMed Central journal article supplement (PMC4480708; doi:10.18632/oncotarget.3048), 2015-02-18
Supplement: oncotarget-06-7675-s001.pdf [file oncotarget-06-7675-s001.pdf]

SUPPLEMENTARY FIGURES AND TABLES

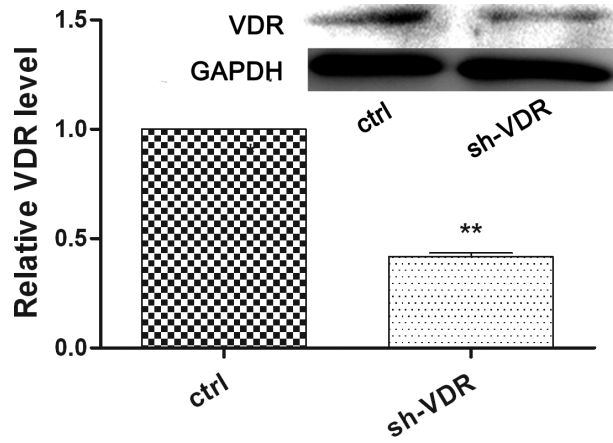

Supplementary Figure 1: qRT-PCR and western blot were performed to determine the expression level of VDR after transfection of sh-VDR.

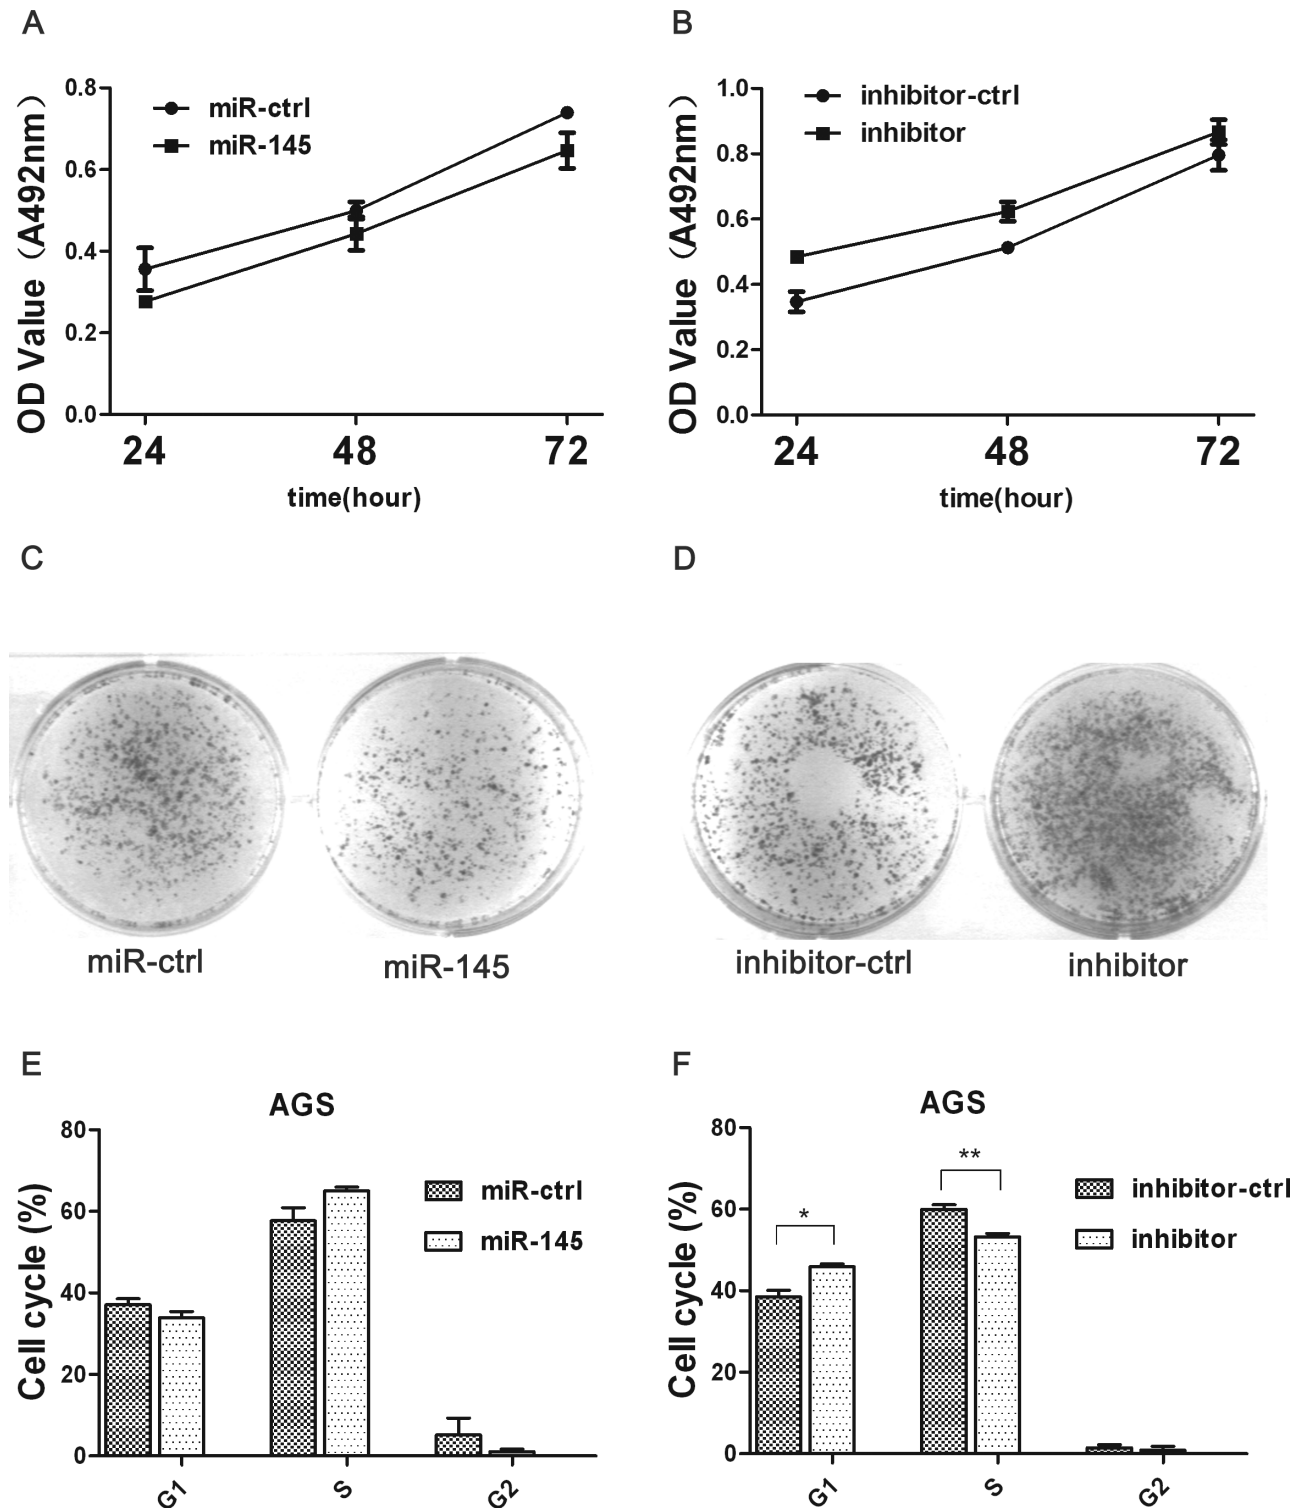

**Supplementary Figure 2: miR-145 inhibits GC AGS cell growth *in vitro*.** (A–B) The effects of miR-145 on AGS cell viability were determined by MTT assay at 24, 48 and 72 h after transfection with miR-145 over-expression construct or miR-145 inhibitor, with empty vector or ASO-NC, respectively. (C–D) Representative micrographs of crystal violet-stained cell colonies were analyzed by colony formation assay at day 12 after transfection. (E–F) Histogram indicated the percentage of cells in G<sub>1</sub>, S and G<sub>2</sub> phases after transfection for 48 h based on the flow-cytometric analysis. Data were presented as mean ± SEM. (\* $p < 0.05$ ; \*\* $p < 0.01$ ).

**Supplementary Table 1: The basic information of all patients**

| Patient No. | Sex | Age | T stage | Histological grade |
|-------------|-----|-----|---------|--------------------|
| 1           | M   | 69  | T4N2M0  | IV                 |
| 2           | M   | 69  | TxN1M1  | IV                 |
| 3           | F   | 49  | T3N2M1  | IV                 |
| 4           | M   | 48  | T4N3M0  | IV                 |
| 5           | M   | 74  | T3N2M1  | IV                 |
| 6           | M   | 62  | T4N1M0  | IV                 |
| 7           | M   | 62  | T2N1M0  | IIb                |
| 8           | M   | 63  | T3N1M0  | IIIa               |
| 9           | M   | 59  | T4N3M0  | II-III             |
| 10          | M   | 79  | T4N1M0  | III                |
| 11          | M   | 40  | T4N1M0  | III                |
| 12          | M   | 68  | T4N1M0  | IIIB               |
| 13          | M   | 62  | T2N2M0  | II                 |
| 14          | M   | 69  | T2N0M0  | Ib                 |
| 15          | M   | 45  | T1N0M0  | I                  |
| 16          | M   | 63  | T4N1M0  | IIIa               |
| 17          | M   | 59  | T4N3M0  | IIIC               |
| 18          | M   | 66  | T2N1M0  | IIa                |
| 19          | M   | 59  | T4N1M0  | II                 |
| 20          | M   | 66  | T4N1M0  | III                |

**Supplementary Table 2: Oligonucleotides and sh-RNA target sequences in this work**

| Gene name         | Gen bank   | Sense oligo sequences (5'-3')                                                                        |
|-------------------|------------|------------------------------------------------------------------------------------------------------|
| Hsa-miR-145       | NR_029686g | AATTCACCTTGTCTCACGGTCCAGTTTTCCC<br>AGGAATCCCTTAGATGCTAAGATGGGGATTCCCT<br>GGAAATACTGTTCTTGAGGTCATGGTT |
| miR-145 inhibitor | NR_029686  | GGAGTCCCTCATAACGGTCCTTAGGGA                                                                          |
| E2F3-3'UTR-WT     | NM_001949  | CTTGTGTTAAGTGCCTACTGGAAAC                                                                            |
| E2F3-3'UTR-MT     | NM_001949  | CTTGTGTTAAGTGCCTACACGAAAC                                                                            |
| CDK6-3'UTR-WT     | NM_001259  | CCAATAATCCTTTGGAAACTGGATC                                                                            |
| CDK6-3'UTR-MT     | NM_001259  | CCAATAATCCTTTGGAAACACGATC                                                                            |
| Si-E2F3           | NM_001949  | GACUUCAUGUGUAGUUGAUU                                                                                 |
| Si-ctrl           |            | UUCUCCGAACGUGUCACGUUU                                                                                |
| Sh-VDR            | NM_000376  | CATCATGTTGCGCTCCAAT                                                                                  |

**Supplementary Table 3: Primers used in this work**

| Gene name    | Sense primer (5'-3')      | Anti-sense primer (5'-3') |
|--------------|---------------------------|---------------------------|
| Hsa-miR-145  | CAGTGCGTGTCGTGGAGT        | AGGTCCAGTTTTCCCAGG        |
| U6           | GCTTCGGCAGCACATATACTAAAAT | CGCTTCACGAATTTGCGTGTCAT   |
| E2F3         | ATATCCCTAAACCCGCTTCC      | TGGTCCTCAGTCTGTAAGA       |
| CDK6         | TGATCAACTAGGAAAAATCTTGGAC | GGCAACATCTCTAGGCCAGT      |
| VDR          | GAAGCTGAACTTGCATGAGGA     | GTCCTGGATGGCCTCAATC       |
| GAPDH        | GCCAAAAGGGTCATCATCTC      | GTAGAGGCAGGGATGATGTTC     |
| miR-145-chip | ACCCCCAAGCGGTGTCTCTCATCCT | tacacttctccgtccccaacctg   |
